# Supplementary material
Source: Research Square preprint supplement (doi:10.21203/rs.3.rs-9290839/v1)
Supplement: Supplementary file 1 [file 01f06f6ee6c63de0ad5627a0.docx]

**Supplementary Table S1:**

| **Region 1** | **Region 2** | **PROACTIVE** | **REACTIVE** |
| --- | --- | --- | --- |
| DMN LP (L) | DMN LP (R) | -0.075 | -0.180 |
| DMN PCC | 0.290 | 0.135 |
| DAN IPS (L) | 0.104 | -0.025 |
| DAN IPS (R) | 0.225 | 0.127 |
| FPN LPFC (L) | 0.140 | 0.412 |
| FPN LPFC (R) | 0.236 | 0.051 |
| FPN PPC (L) | 0.140 | 0.243 |
| FPN PPC (R) | 0.125 | 0.081 |
| LN IFG (L) | 0.372 | 0.240 |
| LN IFG (R) | 0.165 | 0.242 |
| LN pSTG (L) | -0.087 | 0.020 |
| LN pSTG (R) | 0.317 | 0.105 |
| SN ACC | 0.067 | -0.128 |
| SN AIns (L) | 0.250 | 0.303 |
| SN AIns (R) | 0.021 | -0.139 |
| SN RPFC (L) | -0.441* | -0.467* |
| SN RPFC (R) | 0.090 | 0.062 |
| SN SMG (L) | -0.061 | -0.081 |
| SN SMG (R) | 0.241 | 0.367 |
| SMN Lateral (L) | 0.084 | 0.000 |
| SMN Lateral (R) | 0.009 | 0.174 |
| SMN Superior | -0.086 | 0.284 |
| DMN LP (R) | DMN PCC | -0.122 | -0.095 |
| DAN IPS (L) | -0.426 | -0.419 |
| DAN IPS (R) | 0.000 | 0.162 |
| FPN LPFC (L) | -0.467* | -0.212 |
| FPN LPFC (R) | -0.055 | 0.295 |
| FPN PPC (L) | -0.352 | -0.060 |
| FPN PPC (R) | 0.193 | 0.026 |
| LN IFG (L) | 0.044 | 0.198 |
| LN IFG (R) | -0.168 | -0.039 |
| LN pSTG (L) | 0.365 | 0.196 |
| LN pSTG (R) | -0.112 | -0.161 |
| SN ACC | -0.248 | -0.229 |
| SN AIns (L) | 0.099 | 0.163 |
| SN AIns (R) | -0.124 | -0.005 |
| SN RPFC (L) | 0.148 | 0.189 |
| SN RPFC (R) | 0.284 | 0.331 |
| SN SMG (L) | -0.242 | -0.047 |
| SN SMG (R) | 0.209 | -0.183 |
| SMN Lateral (L) | -0.030 | 0.018 |
| SMN Lateral (R) | -0.103 | -0.069 |
| SMN Superior | **-0.616*** | **-0.554*** |
| DMN PCC | DAN IPS (L) | -0.174 | 0.019 |
| DAN IPS (R) | -0.019 | 0.062 |
| FPN LPFC (L) | 0.266 | 0.283 |
| FPN LPFC (R) | -0.342 | -0.041 |
| FPN PPC (L) | 0.016 | 0.148 |
| FPN PPC (R) | -0.270 | -0.275 |
| LN IFG (L) | -0.315 | -0.393 |
| LN IFG (R) | -0.070 | 0.058 |
| LN pSTG (L) | 0.182 | 0.384 |
| LN pSTG (R) | 0.433 | 0.353 |
| SN ACC | -0.211 | 0.129 |
| SN AIns (L) | 0.104 | 0.242 |
| SN AIns (R) | -0.024 | 0.335 |
| SN RPFC (L) | **-0.518*** | -0.072 |
| SN RPFC (R) | 0.496* | 0.454* |
| SN SMG (L) | -0.059 | 0.249 |
| SN SMG (R) | **-0.512*** | -0.396 |
| SMN Lateral (L) | 0.025 | 0.046 |
| SMN Lateral (R) | -0.071 | -0.113 |
| SMN Superior | 0.088 | 0.157 |
| DAN IPS (L) | DAN IPS (R) | 0.005 | 0.046 |
| FPN LPFC (L) | -0.127* | -0.053 |
| FPN LPFC (R) | 0.083 | 0.266 |
| FPN PPC (L) | 0.263 | 0.271 |
| FPN PPC (R) | -0.140 | 0.183 |
| LN IFG (L) | -0.467* | -0.231* |
| LN IFG (R) | -0.240 | -0.067 |
| LN pSTG (L) | -0.267 | -0.303 |
| LN pSTG (R) | 0.186* | 0.345 |
| FPN LPFC (L) | 0.391* | 0.040 |
| FPN LPFC (R) | 0.015 | -0.105 |
| FPN PPC (L) | -0.404 | -0.318 |
| FPN PPC (R) | 0.026 | -0.028 |
| LN IFG (L) | 0.227* | 0.493* |
| LN IFG (R) | 0.375 | 0.142 |
| LN pSTG (L) | -0.069 | -0.210 |
| LN pSTG (R) | -0.435* | -0.344 |
| FPN LPFC (L) | FPN LPFC (R) | -0.362 | -0.313 |
| FPN PPC (L) | 0.181 | 0.143 |
| FPN PPC (R) | 0.286 | 0.158 |
| LN IFG (L) | 0.103 | 0.156 |
| LN IFG (R) | 0.356 | 0.235 |
| LN pSTG (L) | 0.364 | 0.255 |
| LN pSTG (R) | **-0.505*** | **-0.502*** |
| FPN LPFC (R) | FPN PPC (R) | -0.089 | -0.065 |
| LN IFG (L) | -0.382 | -0.309 |
| LN IFG (R) | -0.189 | -0.084 |
| LN pSTG (L) | 0.038 | 0.125 |
| LN pSTG (R) | -0.108 | 0.137 |
| FPN PPC (L) | FPN LPFC (R) | -0.309 | -0.231 |
| FPN PPC (R) | 0.232 | 0.057 |
| LN IFG (L) | -0.073 | 0.015 |
| LN IFG (R) | -0.031 | 0.057 |
| LN pSTG (L) | 0.005 | -0.085 |
| LN pSTG (R) | -0.120 | -0.033 |
| FPN PPC (R) | LN IFG (L) | -0.391 | -0.048 |
| LN IFG (R) | 0.262 | 0.303 |
| LN pSTG (L) | **-0.525*** | **-0.545*** |
| LN pSTG (R) | 0.162 | 0.167 |
| LN IFG (L) | LN IFG (R) | 0.233 | 0.227 |
| LN pSTG (L) | 0.124 | 0.201 |
| LN pSTG (R) | -0.037 | 0.208 |
| LN IFG (R) | LN pSTG (L) | 0.129 | 0.098 |
| LN pSTG (R) | -0.042 | -0.104 |
| LN pSTG (L) | LN pSTG (R) | 0.036 | 0.162 |
| SN ACC | DAN IPS (L) | -0.404 | -0.320 |
| DAN IPS (R) | -0.298 | -0.137 |
| FPN LPFC (L) | 0.090 | 0.052 |
| FPN LPFC (R) | -0.245 | -0.115 |
| FPN PPC (L) | -0.318 | -0.366 |
| FPN PPC (R) | -0.120 | -0.077 |
| LN IFG (L) | -0.014 | -0.015 |
| LN IFG (R) | -0.064 | -0.040 |
| LN pSTG (L) | -0.178 | -0.209 |
| LN pSTG (R) | -0.429 | -0.336 |
| SN AIns (L) | 0.181 | 0.053 |
| SN AIns (R) | -0.054 | -0.126 |
| SN RPFC (L) | -0.270 | -0.022 |
| SN RPFC (R) | -0.308 | -0.218 |
| SN SMG (L) | 0.081 | 0.080 |
| SN SMG (R) | -0.249 | -0.039 |
| SN AIns (L) | DAN IPS (L) | 0.325 | 0.048 |
| DAN IPS (R) | -0.122 | -0.174 |
| FPN LPFC (L) | -0.378 | -0.286 |
| FPN LPFC (R) | -0.070 | -0.183 |
| FPN PPC (L) | -0.244 | -0.093 |
| FPN PPC (R) | -0.049 | -0.147 |
| LN IFG (L) | 0.136 | 0.124 |
| LN IFG (R) | 0.028 | 0.176 |
| LN pSTG (L) | -0.417 | -0.184 |
| LN pSTG (R) | -0.361 | -0.092 |
| SN AIns (R) | 0.056 | 0.156 |
| SN RPFC (L) | 0.192 | 0.149 |
| SN RPFC (R) | 0.008 | 0.155 |
| SN SMG (L) | -0.098 | 0.035 |
| SN SMG (R) | -0.172 | -0.173 |
| SN AIns (R) | DAN IPS (L) | 0.389 | 0.293 |
| DAN IPS (R) | -0.117 | -0.132 |
| FPN LPFC (L) | -0.140 | 0.141 |
| FPN LPFC (R) | 0.247 | 0.044 |
| FPN PPC (L) | -0.356 | -0.186 |
| FPN PPC (R) | 0.423 | 0.369 |
| LN IFG (L) | 0.421 | 0.397 |
| LN IFG (R) | 0.056 | 0.108 |
| LN pSTG (L) | -0.010 | -0.198 |
| LN pSTG (R) | -0.091 | -0.181 |
| SN RPFC (L) | -0.097 | -0.282 |
| SN RPFC (R) | 0.004 | 0.029 |
| SN SMG (L) | -0.025 | -0.135 |
| SN SMG (R) | 0.016 | 0.154 |
| SN RPFC (L) | DAN IPS (L) | 0.238 | 0.296 |
| DAN IPS (R) | -0.011 | -0.004 |
| FPN LPFC (L) | 0.170 | 0.242 |
| FPN LPFC (R) | 0.441 | 0.416 |
| FPN PPC (L) | 0.285 | 0.359 |
| FPN PPC (R) | 0.212 | 0.312 |
| LN IFG (L) | 0.427 | 0.381 |
| LN IFG (R) | -0.300 | -0.210 |
| LN pSTG (L) | 0.041 | 0.048 |
| LN pSTG (R) | 0.439 | 0.321 |
| SN RPFC (R) | -0.001 | -0.054 |
| SN SMG (L) | 0.043 | -0.035 |
| SN SMG (R) | -0.160 | -0.028 |
| SN RPFC (R) | DAN IPS (L) | 0.198 | 0.122 |
| DAN IPS (R) | 0.024 | -0.387 |
| FPN LPFC (L) | -0.420 | -0.396 |
| FPN LPFC (R) | 0.017 | 0.091 |
| FPN PPC (L) | -0.129 | -0.273 |
| FPN PPC (R) | -0.118 | 0.041 |
| LN IFG (L) | -0.072 | 0.056 |
| LN IFG (R) | -0.341 | -0.106 |
| LN pSTG (L) | 0.249 | 0.111 |
| LN pSTG (R) | 0.235 | 0.243 |
| SN SMG (L) | 0.127 | 0.038 |
| SN SMG (R) | -0.039 | -0.162 |
| SN SMG (L) | DAN IPS (L) | -0.029 | -0.010 |
| DAN IPS (R) | -0.358 | -0.167 |
| FPN LPFC (L) | -0.112 | 0.016 |
| FPN LPFC (R) | 0.182 | 0.153 |
| FPN PPC (L) | -0.194 | 0.000 |
| FPN PPC (R) | 0.043 | 0.138 |
| LN IFG (L) | -0.181 | -0.207 |
| LN IFG (R) | -0.188 | -0.281 |
| LN pSTG (L) | 0.032 | -0.131 |
| LN pSTG (R) | -0.141 | 0.170 |
| SN SMG (R) | -0.019 | -0.027 |
| SN SMG (R) | DAN IPS (L) | 0.498* | 0.471* |
| DAN IPS (R) | -0.268 | -0.240 |
| FPN LPFC (L) | 0.017 | 0.017 |
| FPN LPFC (R) | 0.293 | 0.249 |
| FPN PPC (L) | 0.075 | -0.129 |
| FPN PPC (R) | 0.115 | 0.122 |
| LN IFG (L) | -0.292 | -0.171 |
| LN IFG (R) | 0.145 | 0.022 |
| LN pSTG (L) | 0.379 | 0.399 |
| LN pSTG (R) | 0.226 | 0.025 |
| SMN Lateral (L) | DAN IPS (L) | -0.399 | -0.087 |
| DAN IPS (R) | -0.395 | -0.344 |
| FPN LPFC (L) | 0.319 | 0.176 |
| FPN LPFC (R) | -0.242 | -0.208 |
| FPN PPC (L) | -0.042 | -0.183 |
| FPN PPC (R) | 0.061 | -0.160 |
| LN IFG (L) | -0.287 | -0.112 |
| LN IFG (R) | -0.176 | -0.155 |
| LN pSTG (L) | -0.266 | -0.226 |
| LN pSTG (R) | 0.118 | -0.194 |
| SN ACC | 0.383* | 0.459* |
| SN AIns (L) | 0.216 | 0.184 |
| SN AIns (R) | 0.354 | 0.362 |
| SN RPFC (L) | -0.292* | -0.440* |
| SN RPFC (R) | -0.392 | -0.133 |
| SN SMG (L) | 0.222 | 0.140 |
| SN SMG (R) | 0.064 | -0.108 |
| SMN Lateral (R) | -0.004 | -0.010 |
| SMN Superior | -0.034 | -0.002 |
| SMN Lateral (R) | DAN IPS (L) | -0.410* | -0.445* |
| DAN IPS (R) | 0.161 | 0.184 |
| FPN LPFC (L) | 0.126 | 0.215 |
| FPN LPFC (R) | -0.426 | -0.260 |
| FPN PPC (L) | -0.063 | -0.011 |
| FPN PPC (R) | -0.252 | -0.164 |
| LN IFG (L) | -0.172 | -0.235 |
| LN IFG (R) | -0.344 | -0.307 |
| LN pSTG (L) | -0.274 | -0.307 |
| LN pSTG (R) | 0.013 | 0.122 |
| SN ACC | 0.467 | 0.222 |
| SN AIns (L) | 0.112 | -0.175 |
| SN AIns (R) | 0.025 | -0.302 |
| SN RPFC (L) | -0.237 | -0.053 |
| SN RPFC (R) | 0.322 | -0.032 |
| SN SMG (L) | -0.098 | -0.022 |
| SN SMG (R) | -0.058 | 0.100 |
| SMN Superior | -0.265 | 0.013 |
| SMN Superior | DAN IPS (L) | 0.415 | 0.402 |
| DAN IPS (R) | -0.101 | -0.417 |
| FPN LPFC (L) | **0.538*** | **0.522*** |
| FPN LPFC (R) | -0.094 | -0.035 |
| FPN PPC (L) | 0.172 | 0.096 |
| FPN PPC (R) | 0.415 | 0.344 |
| LN IFG (L) | 0.331 | 0.358 |
| LN IFG (R) | 0.339 | 0.215 |
| LN pSTG (L) | **0.501*** | 0.407 |
| LN pSTG (R) | -0.366 | -0.421 |
| SN ACC | -0.225 | 0.017 |
| SN AIns (L) | 0.122 | 0.140 |
| SN AIns (R) | -0.262 | -0.239 |
| SN RPFC (L) | 0.163 | 0.000 |
| SN RPFC (R) | 0.120 | 0.059 |
| SN SMG (L) | 0.326 | -0.168 |
| SN SMG (R) | -0.060 | -0.051 |

*Note. Mean intraclass correlation coefficients (ICC) and percentage of non-significant connections for each functional network region across different temporal comparisons. Bold font highlights correlations with both statistical significance and strong effect size (|r| > 0.5). Asterisks (*) mark statistically significant correlations (p-FDR < 0.05). Abbreviations: DMN = Default Mode Network; DAN = Dorsal Attention Network; FPN = Frontoparietal Network; LN = Language Network; SN = Salience Network; SMN = Sensorimotor Network; VN = Visual Network; LP = Lateral Parietal; MPFC = Medial Prefrontal Cortex; PCC = Posterior Cingulate Cortex; FEF = Frontal Eye Fields; IPS = Intraparietal Sulcus; LPFC = Lateral Prefrontal Cortex; PPC = Posterior Parietal Cortex; IFG = Inferior Frontal Gyrus; pSTG = posterior Superior Temporal Gyrus; ACC = Anterior Cingulate Cortex; RPFC = Rostral Prefrontal Cortex; SMG = Supramarginal Gyrus; L = Left; R = Right.*
