# Supplementary material
Source: Research Square preprint supplement (doi:10.21203/rs.3.rs-9290839/v1)
Supplement: Supplementary file 2 [file 0e14104b6f328853dc81693d.docx]

**Figure S3:** Variance Decomposition Demonstrates High ICC Reflects Stable Individual Differences


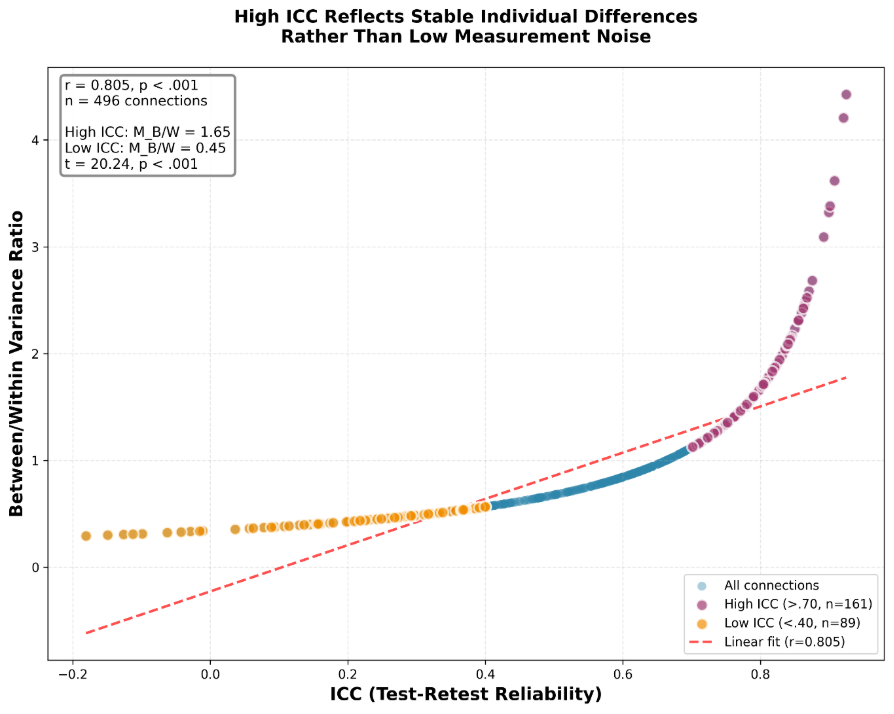


***Note:*** *Scatter plot showing the relationship between ICC (test-retest reliability) and between-subject/within-subject variance ratio across all 496 connections. High-ICC connections (>.70, n=161, purple) show substantially larger B/W ratios (M=1.65) compared to low-ICC connections (<.40, n=89, orange; M=0.45), with a strong positive correlation (r=0.805, p<.001). This dissociation demonstrates that high reliability is driven by dominant between-subject variance (stable individual differences) rather than simply low measurement noise, supporting the biological interpretation of reliability differences across functional networks.*
