# Supplementary material
Source: Research Square preprint supplement (doi:10.21203/rs.3.rs-9290839/v1)
Supplement: Supplementary file 3 [file 0f308f579567f15a5a44a18b.docx]

**Figure S1:** Motion Parameters and Quality Control Metrics Remain Stable Across Scanning Sessions


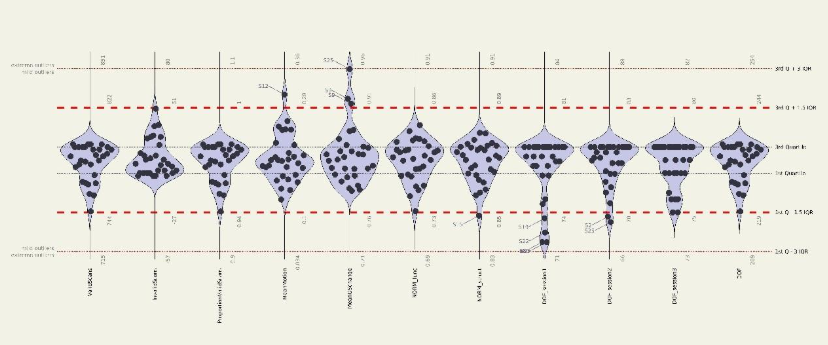


***Note:*** *Violin plots displaying distributions of quality control metrics across the three scanning sessions (baseline, 1-hour, 1-month). Metrics include valid/invalid scans, proportion of valid scans, mean motion (framewise displacement), mean global signal change, NSPIK parameters, and degrees of freedom per session. The consistent distributions across sessions (overlapping interquartile ranges, similar medians) demonstrate successful motion artifact control and stable data quality throughout the study. No systematic changes were observed across time points (all comparisons p>.05), confirming that reliability estimates reflect neural architecture rather than motion-related confounds.*
