# Supplementary material
Source: Research Square preprint supplement (doi:10.21203/rs.3.rs-9290839/v1)
Supplement: Supplementary file 4 [file 2d4e817f58b91bb2ee280ede.docx]

**Figure S2:** Signal Amplitude Does Not Account for Regional Reliability Differences
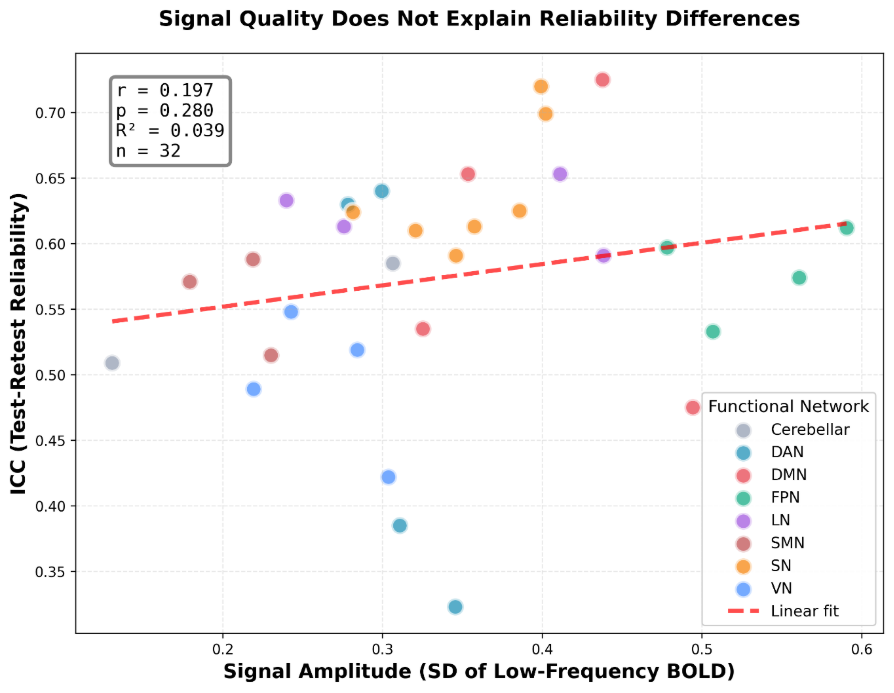


***Note:*** *Relationship between regional signal amplitude (temporal standard deviation of low-frequency BOLD fluctuations, 0.01-0.1 Hz) and test-retest reliability (ICC) across 32 ROIs (n=32). The weak, non-significant correlation (r=0.197, p=0.280, R²=0.039) demonstrates that reliability differences are not driven by regional signal properties. Critically, networks with similar signal amplitudes exhibit markedly different reliability (e.g., Visual Network: M=0.262, ICC=0.494 vs. Salience Network: M=0.356, ICC=0.640), confirming that observed reliability patterns reflect genuine neurobiological stability rather than technical artifacts. ROIs are colored by functional network affiliation.*
