# Supplementary material
Source: Research Square preprint supplement (doi:10.21203/rs.3.rs-9290839/v1)
Supplement: Supplementary file 5 [file 72719894fb60bec0d63cd65e.docx]

**Supplementary Table S2: Variance Decomposition by Network Interaction Pairs**

| **Network** | **Region (ROI)** | **Mean ICC** | **Between-Subject Variance (%)** | **Within-Subject Variance (%)** |
| --- | --- | --- | --- | --- |
| **Cerebellar** | Anterior | .509 | 52.2% | 47.8% |
| Posterior | .585 | 56.5% | 43.5% |
| **DMN** | LP (L) | .725 | **67.4%** | 32.6% |
| LP (R) | .653 | **63.3%** | 36.7% |
| MPFC | .475 | 51.1% | 48.9% |
| PCC | .535 | 55.0% | 45.0% |
| **DAN** | FEF (L) | .385 | 47.2% | 52.8% |
| FEF (R) | .323 | 44.8% | 55.2% |
| IPS (L) | .630 | 59.4% | 40.6% |
| IPS (R) | .640 | **60.5%** | 39.5% |
| **FPN** | LPFC (L) | .533 | 54.3% | 45.7% |
| LPFC (R) | .574 | 56.6% | 43.4% |
| PPC (L) | .612 | 59.6% | 40.4% |
| PPC (R) | .597 | 58.6% | 41.4% |
| **LN** | IFG (L) | .591 | 59.1% | 40.9% |
| IFG (R) | .653 | **61.7%** | 38.3% |
| pSTG (L) | .633 | **60.7%** | 39.3% |
| pSTG (R) | .613 | 59.4% | 40.6% |
| **SN** | ACC | .624 | 59.7% | 40.3% |
| aInsula (L) | .610 | 59.4% | 40.6% |
| aInsula (R) | .613 | 59.3% | 40.7% |
| RPFC (L) | .591 | 57.7% | 42.3% |
| RPFC (R) | .625 | **60.9%** | 39.1% |
| SMG (L) | .720 | **68.4%** | 31.6% |
| SMG (R) | .699 | **66.2%** | 33.8% |
| **SMN** | Lateral (L) | .515 | 53.1% | 46.9% |
| Lateral (R) | .588 | 56.4% | 43.6% |
| Superior | .571 | 56.8% | 43.2% |
| **VN** | Lateral (L) | .548 | 55.6% | 44.4% |
| Lateral (R) | .489 | 52.4% | 47.6% |
| Medial | .519 | 53.0% | 47.0% |
| Occipital | .422 | 48.6% | 51.4% |

**Notes:** *ICC* = Mean Intraclass Correlation Coefficient calculated across all pairwise connections for each ROI. Between-Subject Variance (%) and Within-Subject Variance (%) represent the average proportion of the total variance across all connections involving that ROI. Values in bold highlight regions where between-subject (trait) variance exceeds 60%, indicating high suitability for individual-differences research.
