# Supplementary material
Source: Research Square preprint supplement (doi:10.21203/rs.3.rs-9290839/v1)
Supplement: Supplementary file 6 [file 759df2b3158cf0c5a44e1d44.docx]

**Supplementary Table S3. Age Effects on Test-Retest Reliability of Functional Connectivity**

| **Measure** | **Value** |
| --- | --- |
| **R² Mean (Age variance explained)** | 0.018 (1.8%) |
| **R² SD** | 0.024 (2.4%) |
| **R² Range (min - max)** | 0.000 - 0.154 (0.0% - 15.4%) |
| **Connections with R² < 5%** | 89.5% |
| **Connections with R² > 10%** | 1.2% (n = 6) |
|  |  |
| **ICC Unadjusted Mean** | 0.575 |
| **ICC Unadjusted SD** | 0.210 |
| **ICC Age-Adjusted Mean** | 0.559 |
| **ICC Age-Adjusted SD** | 0.221 |
|  |  |
| **Mean ΔICC (Adjusted - Unadjusted)** | -0.0157 |
| **95% CI for ΔICC** | [-0.0181, -0.0133] |
| **Cohen's d** | -0.07 |
|  |  |
| **Correlation (r) between ICCs** | 0.993 |
| **p-value** | < .001 |
|  |  |
| **Mean |Δ| across intervals** | 0.0173 |
| **Range of |Δ| across intervals** | 0.0160 - 0.0182 |

***Note.****R² = proportion of variance in connectivity explained by age (linear regression); ICC = intraclass correlation coefficient (ICC(3,1) model); ΔICC = difference between age-adjusted and unadjusted ICC values; CI = confidence interval; |Δ| = absolute difference in ICC across different temporal comparisons (Baseline vs 1-Hour, Baseline vs 1-Month, 1-Hour vs 1-Month). All statistics based on n = 496 functional connections across 32 ROIs. Age-adjustment performed via linear regression residualization prior to ICC calculation. The near-perfect correlation (r = .993) and negligible mean difference (ΔICC = -0.016) demonstrate that age does not meaningfully influence reliability estimates in this sample (age range: 19-39 years)*
